# Supplementary material for: Auditory cortical alpha/beta desynchronization prioritizes the representation of memory items during a retention period
Source: eLife journal article supplement (doi:10.7554/elife.55508), 2020-05-07
Supplement: supp [file elife-55508-supp-v1.zip]

Archive with 1 entries (1 files):
- elife_poa_e55508_Transparent_Reporting_File.pdf
